# Supplementary material for: Defining a Treatment Model for Self-Management of Fatigue in Rehabilitation of Acquired Brain Injury Using the Rehabilitation Treatment Specification System
Source: MDPI journal article supplement (doi:10.3390/jcm12093192), 2023-04-28
Supplement: s1 [file s1]

## SUPPLEMENTARY MATERIALS

**Table S1.** Characteristics of service providers and researchers.

| Characteristic  | Service providers |        |        |        |        |        |        |        | Researchers |      |        |
|-----------------|-------------------|--------|--------|--------|--------|--------|--------|--------|-------------|------|--------|
|                 | A.T.              | K.N.   | B.B.   | T.K.   | M.T.   | M.S.   | H.E.   | H.J.   | P.S.        | F.D. | T.S.   |
| Profession      | OT                | NP     | PT     | OT     | NP     | NP     | OT     | OT     | PT          | NP   | OT     |
| Sex             | Female            | Female | Female | Female | Female | Female | Female | Female | Female      | Male | Female |
| Case assignment |                   |        |        |        |        |        |        |        |             |      |        |
| A               | X                 | X      | -      | -      | -      | -      | -      | -      | -           | -    | -      |
| B               | X                 | X      | X      | -      | -      | -      | -      | -      | -           | -    | -      |
| C               | -                 | -      | -      | X      | -      | -      | -      | -      | -           | -    | -      |
| D               | -                 | -      | -      | X      | X      | X      | -      | -      | -           | -    | -      |
| Interviewee     | X                 | -      | -      | X      | -      | -      | -      | -      | -           | -    | -      |
| Workshops       | -                 | X      | X      | -      | -      | -      | X      | X      | X           | X    | X      |

Note: OT = Occupational Therapist; NP = Neuropsychologist; PT = Physiotherapist.

**Table S2.** Standardized outcomes pre- and post-rehabilitation.

| Variable (range)     | Case A |      | Case B |       | Case C |       | Case D |       | Mean (SD)   |            |
|----------------------|--------|------|--------|-------|--------|-------|--------|-------|-------------|------------|
|                      | Pre    | Post | Pre    | Post  | Pre    | Post  | Pre    | Post  | Pre         | Post       |
| DMFS                 |        |      |        |       |        |       |        |       |             |            |
| IF (11–55)           | 28     | 36   | 48     | 42    | 35     | 43    | 31     | 22 *  | 35.5 (8.8)  | 35.8 (9.7) |
| SC (9–45)            | 29     | 25   | 31     | 25    | 26     | 26    | 30 *   | 23    | 29.0 (2.2)  | 24.8 (1.3) |
| MF (7–35)            | 23     | 21   | 33     | 30    | 27     | 30    | 26     | 12    | 27.2 (4.2)  | 23.2 (8.6) |
| PF (6–30)            | 14     | 15   | 19     | 19    | 21     | 23    | 20     | 17 *  | 18.5 (3.1)  | 18.5 (3.4) |
| CF (5–25)            | 11     | 11   | 14     | 15    | 16     | 19    | 18     | 17    | 14.8 (3.0)  | 15.5 (3.4) |
| DASS-21              |        |      |        |       |        |       |        |       |             |            |
| Depression (0–42)    | 2      | 0    | 18     | 14    | 2      | 2 *   | 4      | 2     | 6.5 (7.7)   | 4.5 (6.4)  |
| Anxiety (0–42)       | 4      | 4    | 28     | 20    | 0      | 0     | 2      | 0     | 8.5 (13.1)  | 6.0 (9.5)  |
| Stress (0–42)        | 4      | 4    | 18     | 20    | 2      | 2     | 2      | 0     | 6.5 (7.7)   | 6.5 (9.2)  |
| EQ-5D-5L             |        |      |        |       |        |       |        |       |             |            |
| Index (-0.624–1.000) | 0.859  | -    | 0.727  | 0.626 | 0.783  | 0.719 | 0.742  | 0.799 | .778 (.059) | -          |
| PSQI Global (0–21)   | 8      | 6    | 6      | 6     | 7      | 6     | 7      | 6     | 7.0 (0.8)   | 6.0 (0.0)  |
| GSE total (10–40)    | 33     | 27   | 18     | 23    | 28     | 19    | 28     | 28 *  | 26.8 (6.3)  | 24.2 (4.1) |
| RRTW scale           |        |      |        |       |        |       |        |       |             |            |
| RRTW-PC (3–15)       | 6      | 15   | 6      | 9     | 9      | -     | 4      | 3 *   | 6.3 (2.1)   | -          |
| RRTW-C (3–15)        | 9      | 3    | 12     | 10    | 10     | -     | 9      | 8     | 10.0 (1.4)  | -          |
| RRTW-E (4–20)        | 18     | 4    | 12     | 7     | 10     | -     | 9      | 14    | 12.2 (4.0)  | -          |
| RRTW-B (3–15)        | 12     | 3    | 12     | 10    | 9      | -     | 13     | 9     | 11.5 (1.7)  | -          |

Note: DMFS = Dutch Multifactor Fatigue Scale (greater score indicates worse problems); IF = Impact of Fatigue; SC = Signs and Direct Consequences of Fatigue; MF = Mental Fatigue; PF = Physical Fatigue; CF = Coping with Fatigue; DASS-21 = 21-item Depression Anxiety Stress Scales (greater score indicates more symptoms); EQ-5D-5L = 5 level EQ-5D (greater score indicates better quality of life); PSQI = Pittsburgh Sleep Quality Index (greater score indicates worse sleep quality); GSE = Global Self-Efficacy scale (greater score indicates higher self-efficacy); RRTW = Readiness for Return to Work (greater score indicates more engagement in stage-related behavior); PC = Precontemplation; P = Contemplation; E = Prepared for action – self-evaluative; B = Prepared for action – behavioral. \* One missing item score was imputed by the item mean.
